# Supplementary material for: Fast and sensitive detection of viable Escherichia coli O157:H7 using a microwell-confined and propidium monoazide-assisted digital CRISPR microfluidic platform
Source: Royal Society of Chemistry journal article supplement (doi:10.1039/d4lc00672k), 2024-01-01
Supplement: d4lc00672k1.pdf [file d4lc00672k1.pdf]

**Supplementary information**

**Fast and sensitive detection of viable *Escherichia coli* O157:H7 using microwell confined and propidium monoazide assisted digital CRISPR microfluidic platform**

Weihong Yin, ‡<sup>a</sup> Kai Hu, ‡<sup>a</sup> Bingwen Yu,<sup>ab</sup> Tao Zhang,<sup>\*a</sup> Haohua Mei,<sup>ac</sup> Bowen Zhang,<sup>a</sup> Zheyu Zou,<sup>a</sup> Liping Xia,<sup>a</sup> Yehong Gui,<sup>ac</sup> Juxing Yin,<sup>a</sup> Wei Jin,<sup>ab</sup> and Ying Mu<sup>\*ac</sup>

a. Research Centre for Analytical Instrumentation, State Key Laboratory of Industrial Control Technology, Zhejiang University, Hangzhou 310027, P. R. China;

b. Huzhou Institute of Zhejiang University, Huzhou 313002, P. R. China;

c. College of Life Sciences, Zhejiang University, Hangzhou, 310058, P. R. China.

\* Corresponding author: [zhtao@zju.edu.cn](mailto:zhtao@zju.edu.cn) ; [muying@zju.edu.cn](mailto:muying@zju.edu.cn)

‡ Weihong Yin, Kai Hu contributed to this work equally

### Supplementary results

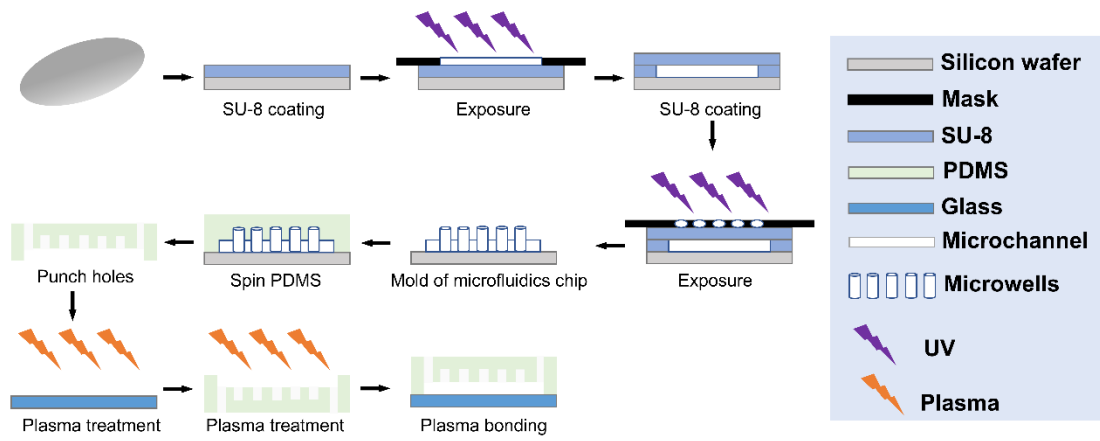

**Figure S1** Fabrication processes of the molds and the microfluidic chips

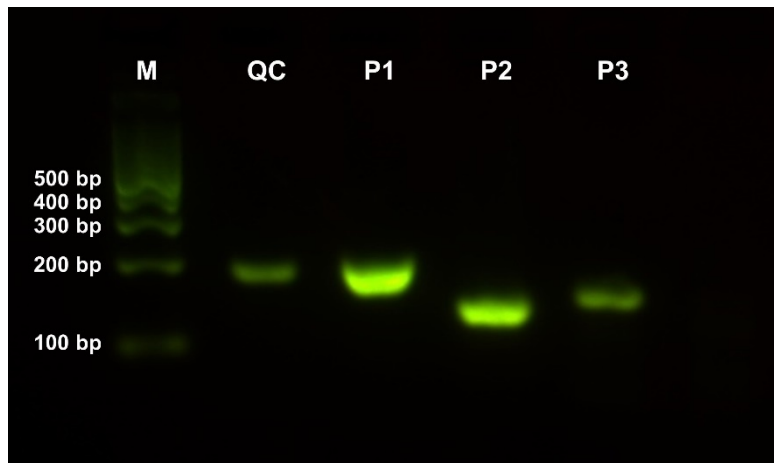

**Figure S2** Agarose gel electrophoresis for RPA product detection. M represents DNA marker; QC represents quality Control; P1, P2 and P3 represents the amplification products of three different primer pairs.

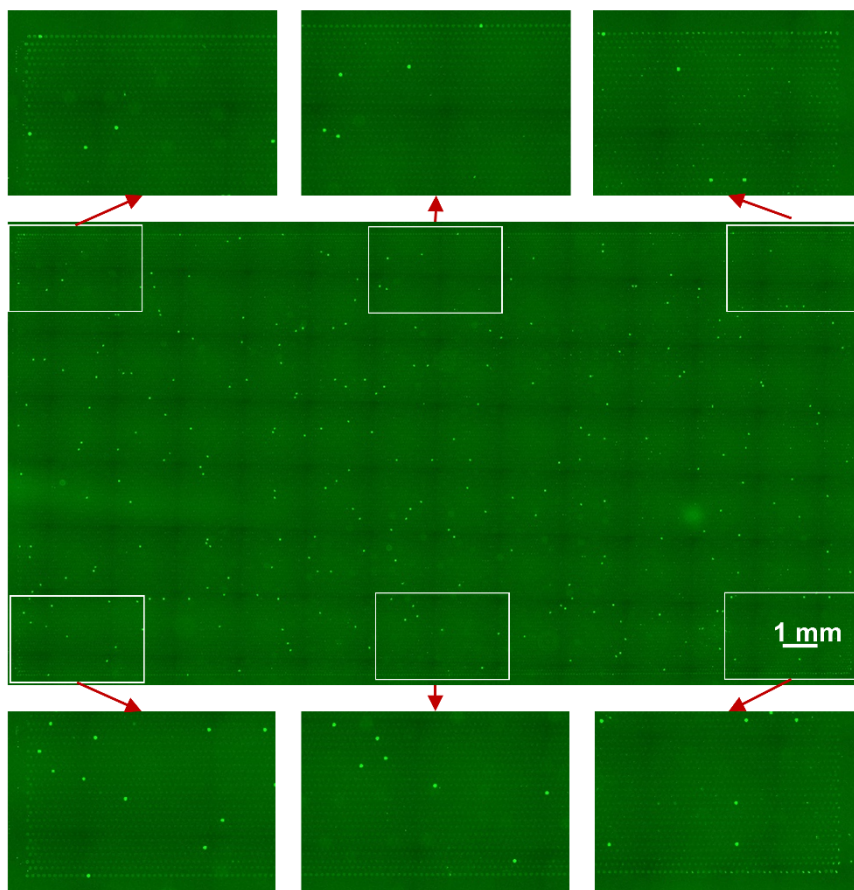

**Figure S3** Fluorescence images of the chip at 37 °C.

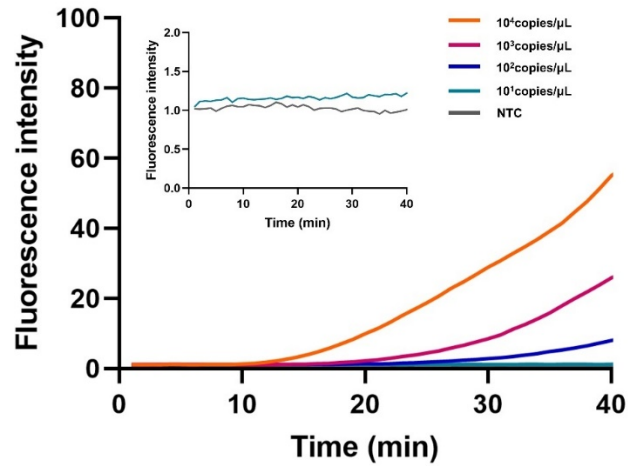

**Figure S4** Real time fluorescence curve of the bulk RPA-CRISPR assay with serial dilutions of synthetic *rfbE* gene.

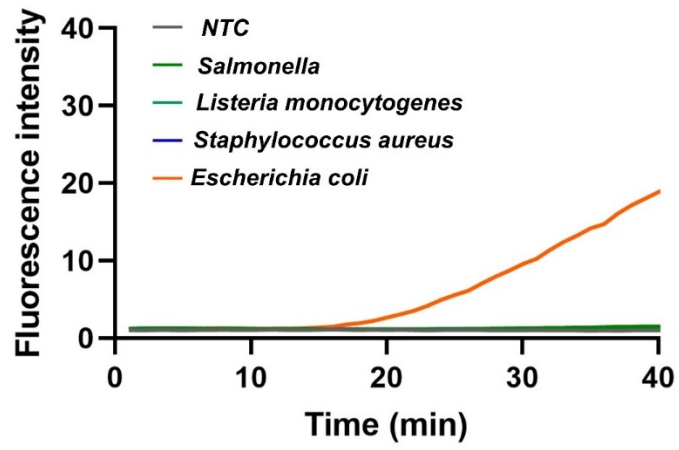

**Figure S5** The specificity of bulk RPA-CRISPR assay.

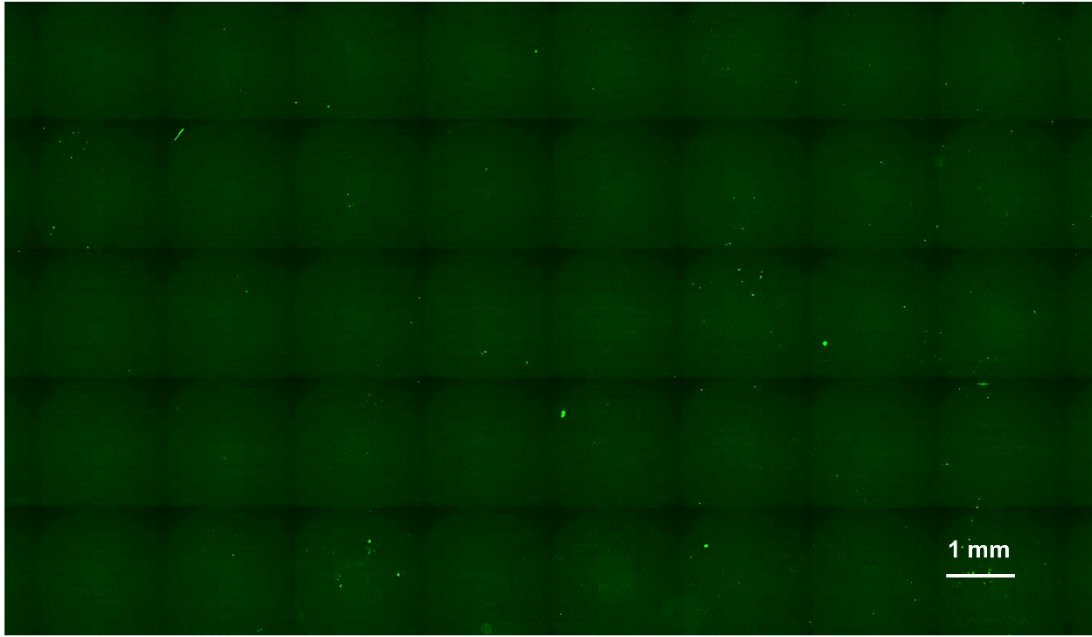

**Figure S6** Fluorescence image captured at a concentration of  $2.5 \times 10^3$  CFU/mL of *E. coli*.

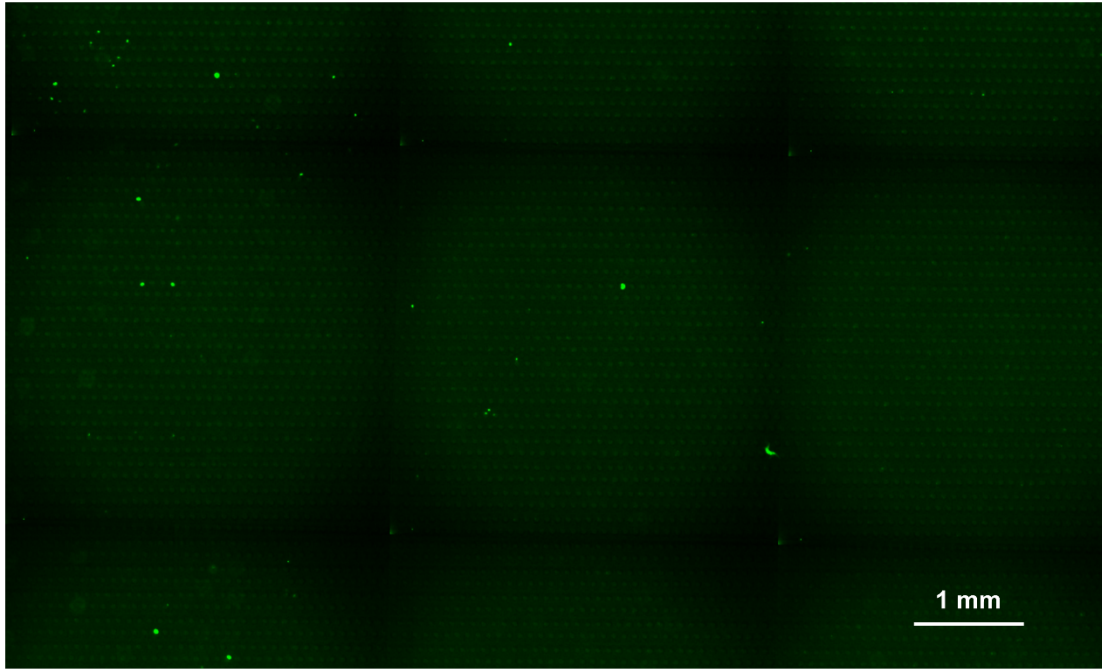

**Figure S7** Fluorescence image captured at a concentration of  $1 \times 10^2$  CFU/mL of *E. coli* O157:H7.



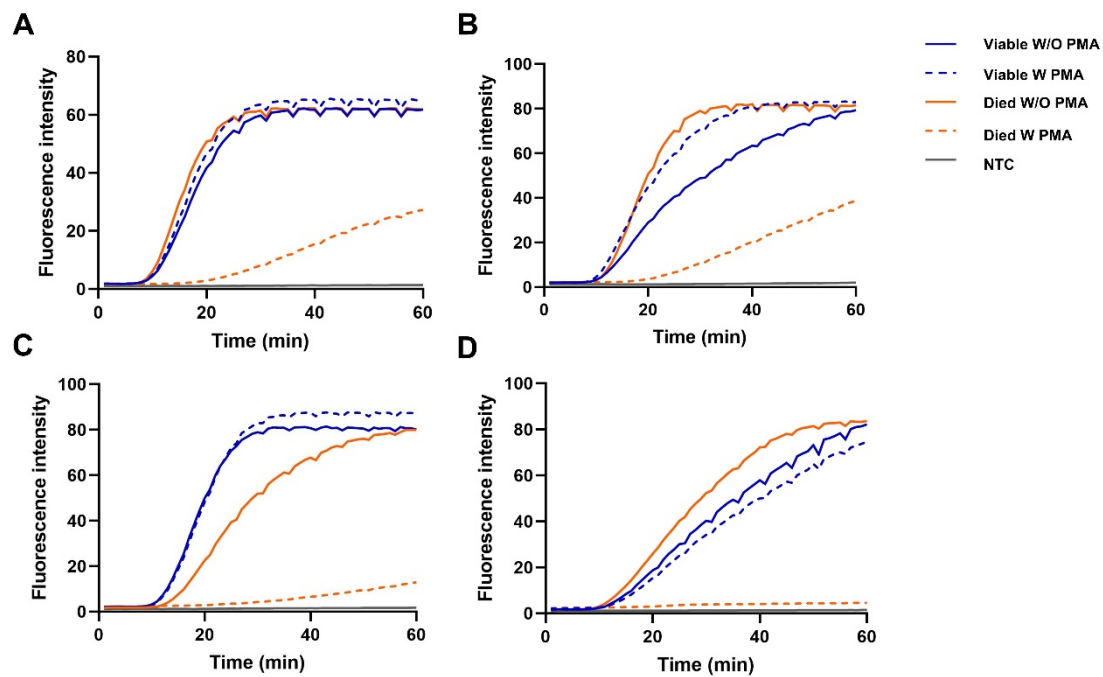

**Figure S8** Real time fluorescence curves after treatment with different PMA concentrations. (A-D) 1,5,25 and 100  $\mu\text{M}$

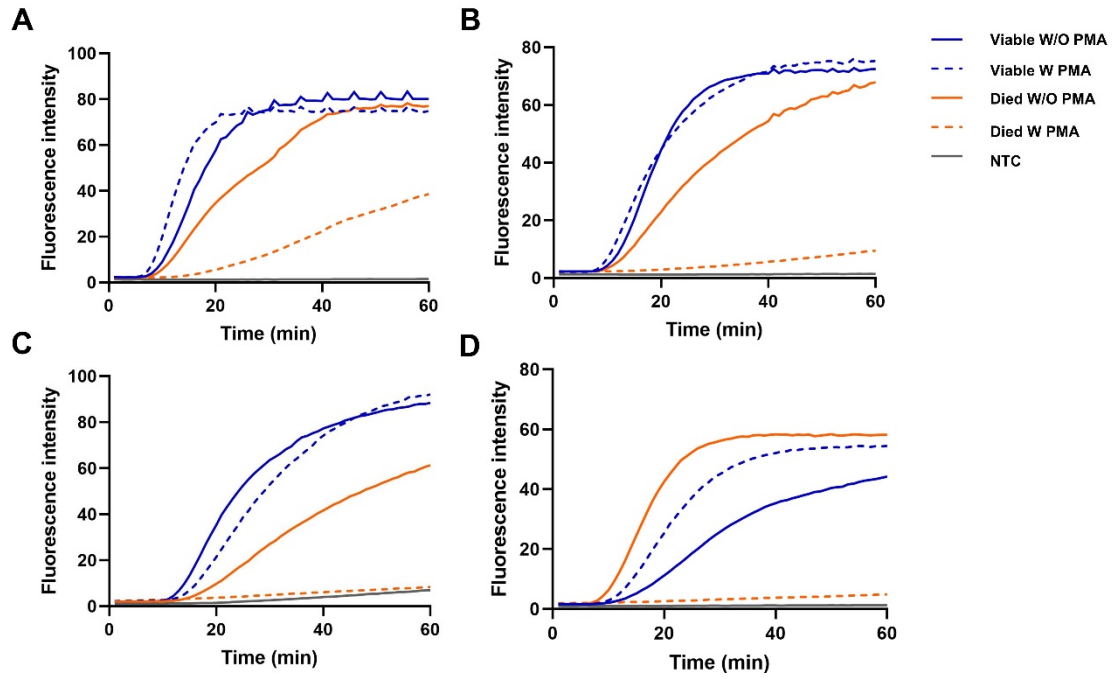

**Figure S9** Real time fluorescence curves after processing with different exposure times. (A-D) 10,30,60 and 180s

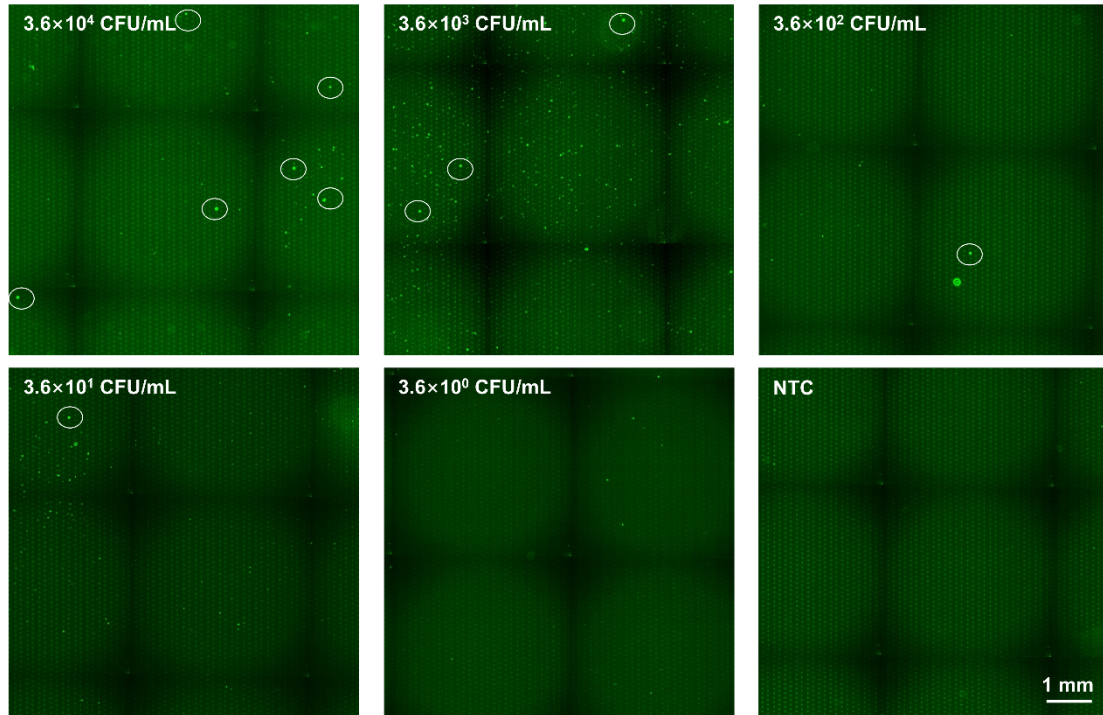

**Figure S10** Fluorescence images of the MP-dCRISPR for *E. coli* O157:H7 detection at different concentrations

**Table S1.** The list of all used sequence in this study

| Name             | Sequence (5'-3')                                                                                                                                                                                                                                                                                                                |
|------------------|---------------------------------------------------------------------------------------------------------------------------------------------------------------------------------------------------------------------------------------------------------------------------------------------------------------------------------|
| <i>rfbE</i> gene | TCAACAGTCTTGTAACAAGTCCACAAGGAAAAGTAAAGATGTTTTTCACACTT<br>ATTGGATGGTCTCAATTCTAACTAGGACCGCAGAGGAAAGAGAGGAATTA<br>AGGAATCACCTTGCAGATAAACTCATCGAAACAAGGCCAGTTTTTTACCCT<br>GTCCACACGATGCCAATGTACTCGGAAAAATATCAAAGCACCTATAGC<br>TGAGGATCTTGGTTGGCGTGGAATTAATTTACCTAGTTTCCCAGCCTATC<br>GAATGAGCAAGTTATTTATATTTGTGAATCTATTAACGAATTTTATA |
| Forward primer1  | GAATTAAGGAATCACCTTGCAGATAAACTCAT                                                                                                                                                                                                                                                                                                |
| Reverse primer1  | ATTCACAAATATAAATAAAGTCTCATTTCGATAG                                                                                                                                                                                                                                                                                              |
| Forward primer2  | GATGCCAATGTACTCGGAAAAATATCAAAG                                                                                                                                                                                                                                                                                                  |
| Reverse primer2  | TCGTTAATAGATTCACAAATATAAATAAAGTCT                                                                                                                                                                                                                                                                                               |
| Forward primer3  | AAGGAAAGTAAAGATGTTTTTCACACTTATTG                                                                                                                                                                                                                                                                                                |
| Reverse primer3  | TATAGGGTGCTTTTGATATTTTCCGAGTACAT                                                                                                                                                                                                                                                                                                |
| crRNA            | UAAUUUCUACUAAGUGUAGAUAGAUCUCAGCUAUAGGGUG                                                                                                                                                                                                                                                                                        |
| Report probe     | FAM-TTATT-BHQ1                                                                                                                                                                                                                                                                                                                  |

**Table S2.** Comparison of currently reported digital CRISPR assays with the MP-dCRISPR assay

| Assay name      | NAA    | CRISPR/Cas | Target            | One-pot | Reaction time | Nuclear acid extraction | Ref.      |
|-----------------|--------|------------|-------------------|---------|---------------|-------------------------|-----------|
| MP-dCRISPR      | RPA    | Cas12a     | <i>E. coli</i>    | Yes     | 15 min        | Extraction-free         | This work |
| RADICA          | RPA    | Cas12a     | SARS-CoV-2/EBV    | Yes     | 40-60 min     | Yes                     | 1         |
| deCOVID         | RT-RPA | Cas12a     | SARS-CoV-2        | Yes     | 30 min        | Yes                     | 2         |
| MEDICA          | RPA    | Cas13a     | HPV16/HPV18       | Yes     | 25 min        | Yes                     | 3         |
| dWS-CRISPR      | LAMP   | Cas12a     | SARS-CoV-2        | Yes     | 90 min        | Yes                     | 4         |
| DropCRISPR      | LAMP   | Cas12a     | <i>Salmonella</i> | No      | 60 min        | Extraction-free         | 5         |
| 3D-CRISPR assay | RPA    | Cas12a     | <i>Salmonella</i> | Yes     | 30 min        | Extraction-free         | 6         |

### References

1. X. Wu, J. K. Tay, C. K. Goh, C. Chan, Y. H. Lee, S. L. Springs, Y. Wang, K. S. Loh, T. K. Lu and H. Yu, *Biomaterials*, 2021, **274**, 120876.
2. J. S. Park, K. Hsieh, L. Chen, A. Kaushik, A. Y. Trick and T. H. Wang, *Adv Sci (Weinh)*, 2021, **8**, 2003564.
3. F. X. Liu, J. Q. Cui, H. Park, K. W. Chan, T. Leung, B. Z. Tang and S. Yao, *Anal Chem*, 2022, **94**, 5883-5892.
4. X. Ding, K. Yin, Z. Li, M. M. Sfeir and C. Liu, *Biosens Bioelectron*, 2021, **184**, 113218.
5. H. Wu, X. Cao, Y. Meng, D. Richards, J. Wu, Z. Ye and A. J. deMello, *Biosens Bioelectron*, 2022, **211**, 114377.
6. L. Xia, J. Yin, J. Zhuang, W. Yin, Z. Zou and Y. Mu, *Anal Chem*, 2023, **95**, 4744-4752.
